# Supplementary material for: Red Cabbage Rather Than Green Cabbage Increases Stress Resistance and Extends the Lifespan of Caenorhabditis elegans
Source: MDPI journal article supplement (doi:10.3390/antiox10060930), 2021-06-08
Supplement: s1 [file s1]

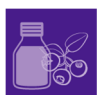

Supplementary Material

# Red Cabbage Rather Than Green Cabbage Increases Stress Resistance and Extends the Lifespan of *Caenorhabditis elegans*

Nan Zhang, Shunshan Jiao and Pu Jing\*

Shanghai Food Safety and Engineering Technology Research Center, Key Lab of Urban Agriculture Ministry of Agriculture, School of Agriculture & Biology, Shanghai Jiao Tong University, Shanghai 200240, China; nzhang@sjtu.edu.cn (N.Z.); sjiao@sjtu.edu.cn (S.J.)

\* Correspondence: pjing@sjtu.edu.cn; Tel.: +86-21-3420-7074

Table S1. Quantitative PCR primers.

| Gene            | Forward                        | Reverse                        | Genes accession number | Annealing temperature | Efficiency |
|-----------------|--------------------------------|--------------------------------|------------------------|-----------------------|------------|
| <i>daf-2</i>    | GGATAAAGGCGAATC<br>AAAGTGTC    | CGATACACTTTCCTT<br>GTGATAGAC   | AF012437.1             | 60                    | 101.5      |
| <i>daf-16</i>   | TTCCGTCCTCCGAACCT<br>CAA       | ATTCGCCAACCCATG<br>ATGG        | AF032112.1             | 60                    | 98.4       |
| <i>sod-3</i>    | CCAACCAGCGCTGAA<br>ATTCAATGG   | GGAACCGAAGTCGCG<br>CTTAATAGT   | NM_078363.9            | 60                    | 95.8       |
| <i>hsf-1</i>    | TTGACGACGACAAGC<br>TTCCAGT     | AAAGCTTGCACCAGA<br>ATCATCCC    | AY559748.1             | 60                    | 102.3      |
| <i>hsp-16.1</i> | CTGAATCTTCTGAGAT<br>TGTTAAC    | TTTGTTCAACGGGCGC<br>TTGC       | NM_072953.5            | 60                    | 97.2       |
| <i>hsp-16.2</i> | CGTCGAAGAGAAATC<br>TGCTGAA     | TGCAGCGAACAATAC<br>TGTAATTTATG | NM_001392482.1         | 60                    | 97.1       |
| <i>sek-1</i>    | TTATGGAGCAGGCAA<br>GAAATG      | AAAGACTTGTTTCGCC<br>ATTCG      | AB024087.1             | 60                    | 98.2       |
| <i>osr-1</i>    | AGCATCATGCCACCT<br>ACGTGA      | CACCACCATTGAATTT<br>CAGCG      | AY360470.1             | 60                    | 99.4       |
| <i>act-1</i>    | CCAGGAATTGCTGAT<br>CGTATGCAGAA | TGGAGAGGGAAGCGA<br>GGATAGA     | NM_073418.9            | 60                    | 103.5      |
